# Supplementary material for: N-Terminal Acetyltransferases Are Cancer-Essential Genes Prevalently Upregulated in Tumours
Source: PubMed Central journal article supplement (PMC7565035; doi:10.3390/cancers12092631), 2020-09-15
Supplement: cancers-12-02631-s001.pdf [file cancers-12-02631-s001.pdf]

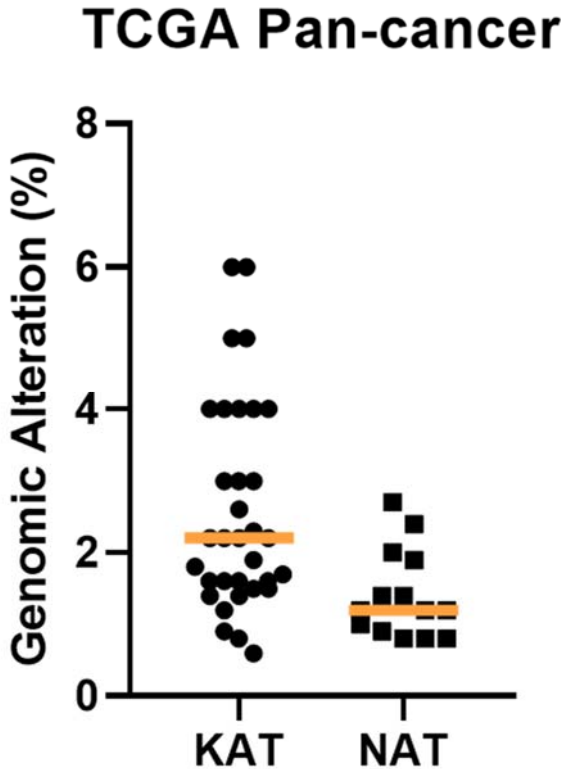

**Figure S1.** Comparison of genomic alteration frequency-both copy number alterations and mutations-for lysine acetyltransferases (KATs) and N-terminal Acetyltransferases (NATs) across TCGA pan-cancer study of 32 tumour types. Each circle represents one gene.

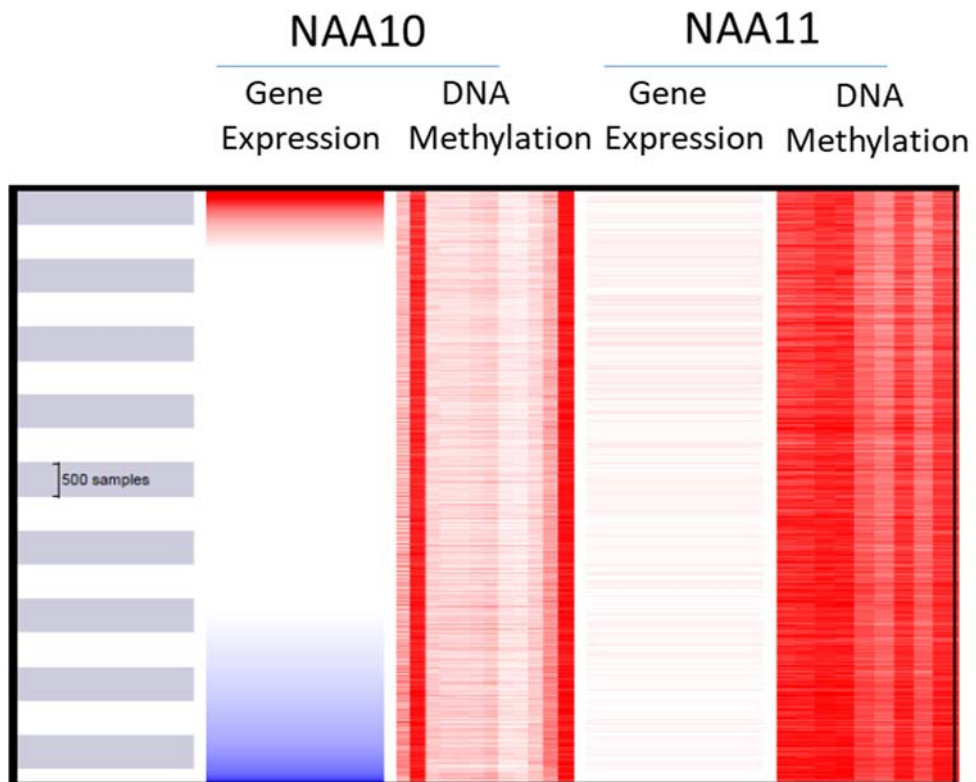

**Figure S2.** A multi-omic comparison of DNA methylation and expression of NAA11 and NAA10 across TCGA pan-cancer study of 32 cancer types. Darker red colour indicates higher values of gene expression or methylation of DNA probes.

## Oncomine

|            | NAA10 | NAA20 | NAA30 | NAA40 | NAA50 | NAA60 | NAA80 | NAA15 | NAA25 | NAA35 | NAA38 | HYPK | NAA11 | NAA16 |
|------------|-------|-------|-------|-------|-------|-------|-------|-------|-------|-------|-------|------|-------|-------|
| Bladder    |       |       |       | 1     | 1     |       |       |       |       |       | 1     | 1    |       |       |
| Brain      |       |       | -1    | 2     |       |       | -1    | 1     |       |       | 2     |      |       | 2     |
| Breast     | 1     |       |       | 1     |       | 1     |       |       |       |       |       | -1   | 1     |       |
| Cervix     | 1     |       |       | 1     | 1     | 1     | -1    |       |       |       |       |      |       |       |
| Colorectal | 6     | 5     | -1    |       | 1     | -1    | 3     | 4     | 3     |       | 3     | 2    | 2     | 3     |
| Esophagus  |       | -1    |       |       |       |       |       |       |       |       |       | 1    |       | -1    |
| Gastric    | 1     | 1     |       | 1     | 3     |       |       | 1     | 3     |       | 1     | 1    | 1     |       |
| Head&Neck  |       | 1     |       |       | 1     |       |       | 1     |       |       | 1     |      |       |       |
| Leukemia   | 1     |       |       | 1     |       |       | 1     |       | 1     |       | 1     |      |       | -1    |
| Liver      | 2     | 1     |       | 3     |       | -1    |       | -1    |       |       | 2     | -1   |       |       |
| Lung       | 1     | -1    |       | 1     | 1     |       |       |       | 1     |       | 1     | 1    | 1     |       |
| Lymphoma   | 1     | 1     |       | -1    |       | 3     | -1    | 2     | 1     | 1     | 2     |      |       |       |
| Myeloma    | 1     | 1     |       |       | 1     |       |       | 1     | 1     | 1     | 1     | 1    |       | 1     |
| Ovarian    | 1     |       |       | 1     | -1    |       |       |       |       |       | 1     |      |       | -2    |
| Pancreas   |       |       |       |       |       |       |       |       |       |       |       |      |       | -2    |
| Prostate   |       |       |       | 1     |       |       |       |       |       | 1     |       | 1    |       | -1    |
| Testicular |       | -1    |       |       |       |       |       |       |       |       |       |      |       |       |
| Tongue     |       | 1     |       |       |       |       |       |       |       |       |       |      |       |       |
| Renal      |       |       |       |       |       |       |       |       |       |       | 1     | 1    |       | 1     |

**Figure S3.** Examination of altered NAT transcript in the Oncomine microarray dataset for tumours with altered expression compared to normal tissues. Positive numbers within boxes indicate the number of studies with significant upregulation of NATs. Negative number within boxes indicate studies with downregulation of NATs.

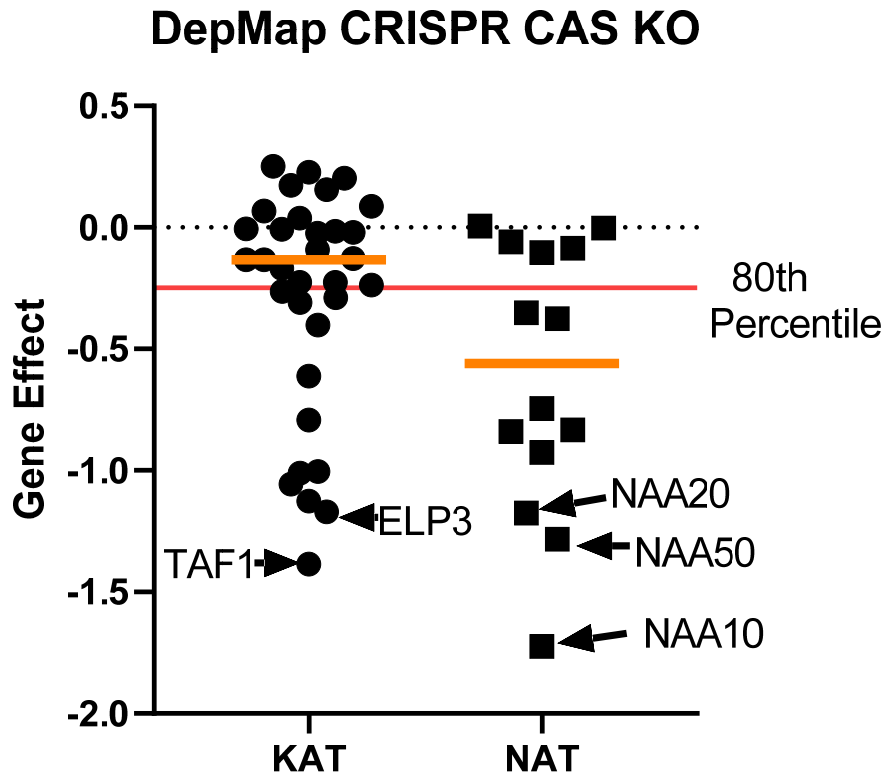

**Figure S4.** Comparison of dependency of cancer cells on KAT and NAT genes. Plotter are average gene effect (CEREC) of CRISPR-CAS KO across 739 cell lines of DepMap project. More negative values indicate greater sensitivity to KO. Each gene is represented by a symbol and the median gene effect across all cell lines is depicted by an orange line.

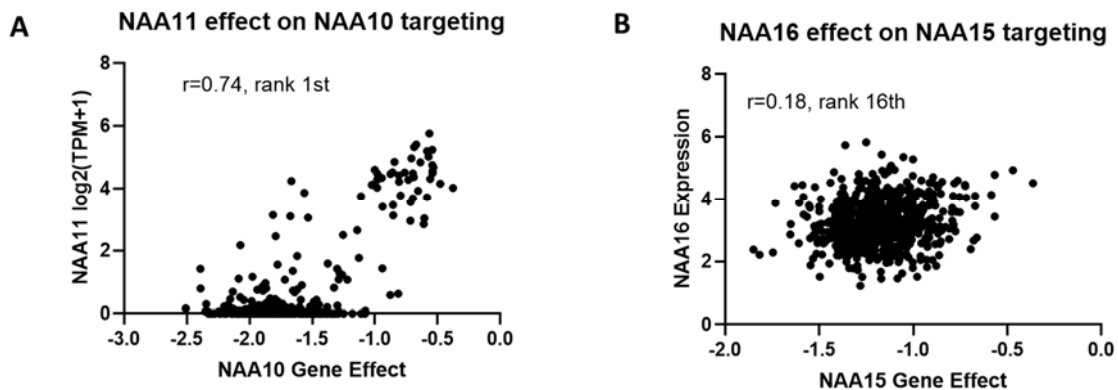

**Figure S5.** NAA11 and NAA16 transcript levels are associated with reduced sensitivity to targeting of their paralogues NAA10 and NAA15 in the DepMap CRISPR CAS KO project. Plots depict scatterplot of expression of NAA11 and NAA16 vs sensitivity of cell lines to targeting of their paralogues. Pearson's correlation was calculated and rank is the relative rank of the correlation of sensitivity to KO of that NAT across all measured transcripts.

#### Supplementary Tables

**Table S1.** Histone H2A missense mutations of "SRGR" motif in TCGA pan-cancer.

| Histone   | Sample          | Tumour                                    | Mutation |
|-----------|-----------------|-------------------------------------------|----------|
| HIST1H2AG | TCGA-DD-AADV-01 | Hepatocellular Carcinoma                  | S1C      |
| HIST1H2AI | TCGA-77-A5GH-01 | Lung Squamous Cell<br>Carcinoma           | S1C      |
| HIST1H2AM | TCGA-CV-A6JU-01 | Head and Neck Squamous                    | S1C      |
| HIST1H2AM | TCGA-FG-A710-01 | Oligodendroglioma                         | S1C      |
| HIST2H2AC | TCGA-EP-A3JL-01 | Hepatocellular Carcinoma                  | S1C      |
| HIST3H2A  | TCGA-ZF-A9R9-01 | Bladder Urothelial Carcinoma              | S1C      |
| HIST1H2AI | TCGA-QK-A8Z7-01 | Head and Neck Squamous                    | S1F      |
| HIST1H2AK | TCGA-A2-A0CT-01 | Breast Invasive Ductal<br>Carcinoma       | S1L      |
| HIST1H2AK | TCGA-AG-A01J-01 | Rectal Adenocarcinoma                     | S1L      |
| HIST2H2AB | TCGA-BB-4223-01 | Head and Neck Squamous                    | S1L      |
| HIST1H2AC | TCGA-OL-A66J-01 | Breast Invasive Lobular<br>Carcinoma      | S1P      |
| HIST2H2AB | TCGA-VQ-A91K-01 | Intestinal Type Stomach<br>Adenocarcinoma | S1P      |
| HIST1H2AL | TCGA-D8-A1XQ-01 | Breast Invasive Ductal<br>Carcinoma       | S1T      |
| HIST1H2AI | TCGA-JY-A6FA-01 | Esophageal Squamous Cell<br>Carcinoma     | S1Y      |
| HIST1H2AJ | TCGA-AX-A2HC-01 | Uterine Endometrioid<br>Carcinoma         | S1Y      |
| HIST1H2AD | TCGA-D7-A4YV-01 | Tubular Stomach<br>Adenocarcinoma         | G2E      |
| HIST1H2AE | TCGA-RS-A6TP-01 | Head and Neck Squamous Cell<br>Carcinoma  | G2E      |
| HIST1H2AI | TCGA-RD-A8N9-01 | Diffuse Type Stomach<br>Adenocarcinoma    | G2E      |
| HIST1H2AA | TCGA-FW-A3TU-06 | Cutaneous Melanoma                        | G2R      |
| HIST1H2AG | TCGA-QQ-A5VC-01 | Leiomyosarcoma                            | G2R      |
| HIST1H2AG | TCGA-24-1417-01 | Serous Ovarian Cancer                     | G2V      |
| HIST1H2AH | TCGA-B6-A0RS-01 | Breast Invasive Ductal<br>Carcinoma       | R3C      |

| Histone   | Sample          | Tumour                               | Mutation |
|-----------|-----------------|--------------------------------------|----------|
| HIST1H2AL | TCGA-AA-3947-01 | Mucinous Adenocarcinoma of the Colon | R3C      |
| HIST3H2A  | TCGA-HU-A4GF-01 | Tubular Stomach Adenocarcinoma       | R3C      |
| HIST2H2AC | TCGA-E7-A5KF-01 | Bladder Urothelial Carcinoma         | R3C      |
| H2AFY     | TCGA-HU-A4GX-01 | Diffuse Type Stomach Adenocarcinoma  | R3C      |
| HIST2H2AC | TCGA-E7-A5KF-01 | Bladder Urothelial Carcinoma         | R3C      |
| HIST1H2AC | TCGA-33-AASI-01 | Lung Squamous Cell Carcinoma         | R3H      |
| HIST1H2AI | TCGA-CM-4743-01 | Colon Adenocarcinoma                 | R3H      |
| HIST2H2AC | TCGA-N5-A4RD-01 | Uterine Carcinosarcoma..             | R3H      |
| HIST1H2AA | TCGA-63-A5MI-01 | Lung Squamous Cell Carcinoma         | R3L      |
| HIST1H2AM | TCGA-60-2723-01 | Lung Squamous Cell Carcinoma         | R3L      |
| HIST1H2AA | TCGA-EE-A29M-06 | Cutaneous Melanoma                   | R3Q      |
| HIST1H2AA | TCGA-EE-A3J8-06 | Cutaneous Melanoma                   | R3Q      |
| HIST1H2AA | TCGA-FS-A1ZK-06 | Cutaneous Melanoma                   | R3Q      |
| HIST1H2AA | TCGA-WE-AAA4-06 | Cutaneous Melanoma                   | R3Q      |
| HIST1H2AG | TCGA-DK-AA6R-01 | Bladder Urothelial Carcinoma         | G4C      |
| HIST2H2AC | TCGA-N5-A4RD-01 | Uterine Carcinosarcoma               | G4C      |
| HIST1H2AM | TCGA-66-2759-01 | Lung Squamous Cell Carcinoma         | G4S      |
| HIST1H2AG | TCGA-DK-AA6R-01 | Bladder Urothelial Carcinoma         | G4V      |
| HIST1H2AH | TCGA-V5-A7RC-01 | Esophageal Squamous Cell Carcinoma   | G4V      |
| HIST1H2AJ | TCGA-CD-8531-01 | Diffuse Type Stomach Adenocarcinoma. | G4V      |

**Table S2.** Histone H4 missense mutations of “SRGR” motif in TCGA pan-cancer.

| Histone  | Sample          | Tumour                                    | Mutation |
|----------|-----------------|-------------------------------------------|----------|
| HIST1H4H | TCGA-DK-A3WW-01 | Bladder Urothelial Carcinoma              | S1C      |
| HIST1H4K | TCGA-CH-5794-01 | Prostate Adenocarcinoma                   | S1C      |
| HIST1H4A | TCGA-24-2280-01 | Serous Ovarian Cancer                     | S1F      |
| HIST1H4B | TCGA-IR-A3LK-01 | Cervical Squamous Cell Carcinoma          | S1F      |
| HIST1H4E | TCGA-OR-A5LF-01 | Adrenocortical Carcinoma                  | S1F      |
| HIST4H4  | TCGA-19-5956-01 | Glioblastoma Multiforme                   | S1Y      |
| HIST1H4J | TCGA-DD-A4NV-01 | Hepatocellular Carcinoma                  | G2S      |
| HIST1H4D | TCGA-GC-A3RC-01 | Bladder Urothelial Carcinoma              | G2A      |
| HIST1H4D | TCGA-CC-A7IE-01 | Hepatocellular Carcinoma                  | G2A      |
| HIST1H4F | TCGA-73-A9RS-01 | Lung Adenocarcinoma                       | G2V      |
| HIST1H4J | TCGA-CQ-5332-01 | Head and Neck Squamous Cell<br>Carcinoma  | G2V      |
| HIST1H4I | TCGA-EO-A22U-01 | Uterine Endometrioid Carcinoma            | R3C      |
| HIST1H4J | TCGA-J9-A8CM-01 | Prostate Adenocarcinoma                   | R3C      |
| HIST1H4J | TCGA-DX-A8BU-01 | Undifferentiated Pleomorphic Sarcoma      | R3C      |
| HIST1H4K | TCGA-VQ-A94R-01 | Intestinal Type Stomach<br>Adenocarcinoma | R3C      |
| HIST1H4K | TCGA-ZB-A96V-01 | Thymoma                                   | R3C      |
| HIST1H4B | TCGA-B3-8121-01 | Papillary Renal Cell Carcinoma            | R3G      |
| HIST1H4J | TCGA-DJ-A1QG-01 | Papillary Thyroid Cancer                  | R3G      |
| HIST1H4F | TCGA-LD-A74U-01 | Breast Invasive Carcinoma (NOS)           | R3K      |
| HIST4H4  | TCGA-GU-AATO-01 | Bladder Urothelial Carcinoma              | R3Q      |
| HIST1H4E | TCGA-91-6829-01 | Lung Adenocarcinoma                       | G4C      |
| HIST1H4B | TCGA-Z2-AA3S-06 | Cutaneous Melanoma                        | G4D      |
| HIST1H4J | TCGA-BR-6709-01 | Stomach Adenocarcinoma                    | G4D      |
| HIST1H4E | TCGA-CR-5247-01 | Head and Neck Squamous Cell<br>Carcinoma  | G4S      |
| HIST1H4K | TCGA-NH-A5IV-01 | Colon Adenocarcinoma                      | G4S      |
| HIST1H4K | TCGA-MP-A4SW-01 | Lung Adenocarcinoma                       | G4S      |
| HIST1H4K | TCGA-AJ-A3OJ-01 | Uterine Endometrioid Carcinoma            | G4V      |

**Table S3.** List of Oncomine microarray studies with significant deregulation of one or more NAT genes.

| <b>Cancer</b> | <b>Study</b>                                           | <b>Up</b>                                                           | <b>Down</b>     |
|---------------|--------------------------------------------------------|---------------------------------------------------------------------|-----------------|
| Bladder       | Sanchez-Carbayo et al., J Clin Oncol<br>2006/02/10     | NAA40; NAA50; NAA38; HYPK                                           | None            |
| Brain         | Sun et al.,<br>Cancer Cell 2006/04/01                  | NAA40; NAA15; NAA38; NAA16                                          | NAA30;<br>NAA80 |
| Brain         | TCGA                                                   | NAA40; NAA38; NAA16                                                 | None            |
| Breast        | Curtis et al., Nature 2012/04/18                       | NAA10                                                               | HYPK            |
| Breast        | TCGA                                                   | NAA40; NAA60; NAA11                                                 | None            |
| Cervix        | Scotto et al., Genes Chromosomes Cancer<br>2008/09/01  | NAA10; NAA40; NAA60                                                 | NAA80           |
| Cervix        | Zhai Cancer Res 2007/11/01                             | NAA50                                                               | None            |
| Colorectal    | Hong et al.,<br>Clin Exp Metastasis 2010/02/01         | NAA10; NAA20; NAA25; NAA80;<br>NAA15; NAA38; HYPK; NAA16            | None            |
| Colorectal    | Gaedcke et al.,<br>Genes Chromosomes Cancer 2010/11/01 | NAA10; NAA20; NAA80; NAA11;<br>NAA16                                | None            |
| Colorectal    | TCGA                                                   | NAA10; NAA20; NAA50; NAA80;<br>NAA15; NAA25; NAA38; NAA11;<br>NAA16 | NAA60           |
| Colorectal    | Skrzypczak et al., PLoS One 2010/10/01                 | NAA10; NAA20; NAA15; NAA25;<br>NAA38                                | NAA30           |
| Colorectal    | Graudens et al., Genome Biol 2006/03/15                | NAA10                                                               | None            |
| Colorectal    | Ki et al., Int J Cancer 2007/11/01                     | NAA10                                                               | None            |
| Colorectal    | Sabates-Bellver et al., Mol Cancer<br>Res 2007/12/01   | NAA20; HYPK; NAA15                                                  | None            |
| Esophagus     | Hao et al., Gastroenterology 2006/09/01                | HYPK                                                                | None            |
| Esophagus     | Kim et al., PLoS One 2010/11/30                        | None                                                                | NAA20;<br>NAA16 |
| Gastric       | D'Errico et al., Eur J Cancer 2009/02/01               | NAA10; NAA20; NAA40; NAA50;<br>NAA15; NAA25; NAA38; HYPK;<br>NAA11  | None            |
| Gastric       | Cho et al., Clin Cancer Res 2011/04/01                 | NAA50; NAA25                                                        | None            |
| Gastric       | Chen et al.,<br>Mol Biol Cell 2003/08/01               | NAA50; NAA25                                                        | None            |
| Head&Neck     | Estilo et al., BMC Cancer 2009/01/12                   | NAA20                                                               | None            |
| Head&Neck     | Sengupta et al., Cancer Res 2006/08/01                 | NAA50; NAA15                                                        | None            |
| Leukemia      | Haferlach et al., J Clin Oncol 2010/05/20              | NAA10; NAA40; NAA80; NAA25;<br>NAA38                                | NAA16           |
| Liver         | Wurmbach et al., Hepatology 2007/04/01                 | NAA20; NAA40                                                        | None            |



| Cancer       | Study                                                     | Up                                                                 | Down                     |
|--------------|-----------------------------------------------------------|--------------------------------------------------------------------|--------------------------|
| Liver        | Roessler et al., Cancer Res 2010/12/15- Cohort 1          | NAA10; NAA40; NAA38                                                | None                     |
| Liver        | Roessler et al., Cancer Res 2010/12/15- Cohort 2          | NAA10; NAA40; NAA38                                                | None                     |
| Liver        | Mas et al., Mol Med 2008/12/21                            | None                                                               | NAA60;<br>NAA15;<br>HYPK |
| Lung         | Beer et al., Nat Med 2002/08/01                           | NAA10                                                              | None                     |
| Lung         | Hou et al., PLoS One 2010/04/22                           | NAA20; NAA40; NAA50; NAA25;<br>NAA38; NAA11                        | None                     |
| Lung         | Selamat et al., Genome Res 2012/07/01                     | HYPK                                                               | None                     |
| Lung         | Bhattacharjee et al., Proc Natl Acad Sci U S A 2001/11/20 | None                                                               | NAA20                    |
| Lymphom<br>a | Compagno et al., Nature 2009/06/04                        | NAA10; NAA20; NAA60; NAA15;<br>NAA35; NAA38; NAA16                 | NAA40                    |
| Lymphom<br>a | Piccaluga et al., J Clin Invest 2007/03/01                | NAA60; NAA15; NAA25; NAA38;<br>NAA38                               | NAA80                    |
| Lymphom<br>a | Brune et al., J Exp Med 2008/09/29                        | NAA60                                                              | None                     |
| Myeloma      | Zhan et al., Blood 2007/02/15                             | NAA10; NAA20; NAA50; NAA15;<br>NAA25; NAA35; NAA38; HYPK;<br>NAA16 | None                     |
| Ovarian      | Bonome et al., Cancer Res 2008/07/01                      | NAA10; NAA38                                                       | NAA50;<br>NAA16          |
| Ovarian      | Yoshihara et al., Cancer Sci 2009/08/01                   | NAA40                                                              | NAA16                    |
| Pancreas     | Badea et al., Hepatogastroenterology 2008/11/01           | None                                                               | NAA16                    |
| Pancreas     | Pei et al., Cancer Cell 2009/09/08                        | None                                                               | NAA16                    |
| Prostate     | Tomlins et al., Nat Genet 2007/01/01                      | NAA30; NAA35                                                       | None                     |
| Prostate     | Lapointe et al., Proc Natl Acad Sci U S A 2004/01/20      | HYPK                                                               | None                     |
| Prostate     | Wallace et al., Cancer Res 2008/02/01                     | None                                                               | NAA11;<br>NAA16          |
| Testicular   | Sperger et al., Proc Natl Acad Sci U S A 2003/11/11       | None                                                               | NAA20                    |
| Tongue       | Talbot Cancer Res 2005/04/15                              | NAA20                                                              | None                     |
| Renal        | Beroukhim et al., Cancer Res 2009/06/01                   | NAA38                                                              | None                     |
| Renal        | Jones et al., Clin Cancer Res 2005/08/15                  | HYPK; NAA16                                                        | None                     |

\*Significance threshold was Fold change >1.5 between groups and p<0.05

**Table S4.** DepMap Project Co-dependency Correlations.

|       | NAA10 | NAA20 | NAA30 | NAA40 | NAA50 | NAA60 | NAA80 | NAA15 | NAA25       | NAA35       | NAA38       | HYPK        | NAA11 | NAA16 |
|-------|-------|-------|-------|-------|-------|-------|-------|-------|-------------|-------------|-------------|-------------|-------|-------|
| NAA10 | 1     | 0.02  | 0.00  | 0.04  | -0.02 | -0.01 | -0.02 | 0.01  | 0.01        | -0.02       | 0.03        | 0.05        | 0.00  | 0.00  |
| NAA20 |       | 1.00  | 0.07  | 0.09  | -0.01 | 0.04  | 0.00  | 0.08  | <b>0.20</b> | 0.06        | 0.04        | 0.04        | 0.02  | 0.01  |
| NAA30 |       |       | 1.00  | 0.04  | 0.00  | -0.01 | -0.07 | -0.04 | 0.10        | <b>0.17</b> | <b>0.13</b> | 0.05        | -0.05 | -0.07 |
| NAA40 |       |       |       | 1.00  | -0.03 | 0.00  | 0.08  | 0.06  | 0.01        | 0.07        | 0.04        | 0.08        | -0.02 | 0.04  |
| NAA50 |       |       |       |       | 1.00  | 0.02  | 0.04  | -0.10 | 0.04        | 0.00        | 0.03        | -0.09       | -0.01 | 0.01  |
| NAA60 |       |       |       |       |       | 1.00  | 0.03  | -0.05 | -0.06       | -0.03       | -0.04       | 0.01        | -0.07 | -0.03 |
| NAA80 |       |       |       |       |       |       | 1.00  | 0.02  | -0.05       | -0.03       | 0.07        | 0.02        | -0.08 | -0.04 |
| NAA15 |       |       |       |       |       |       |       | 1.00  | 0.04        | 0.02        | 0.05        | <b>0.14</b> | -0.02 | 0.04  |
| NAA25 |       |       |       |       |       |       |       |       | 1.00        | 0.07        | -0.02       | 0.07        | -0.02 | 0.01  |
| NAA35 |       |       |       |       |       |       |       |       |             | 1.00        | 0.09        | 0.10        | -0.02 | 0.00  |
| NAA38 |       |       |       |       |       |       |       |       |             |             | 1.00        | -0.05       | -0.04 | 0.02  |
| HYPK  |       |       |       |       |       |       |       |       |             |             |             | 1.00        | 0.08  | 0.03  |
| NAA11 |       |       |       |       |       |       |       |       |             |             |             |             | 1.00  | 0.07  |
| NAA16 |       |       |       |       |       |       |       |       |             |             |             |             |       | 1.00  |

Table shows the co-dependency correlation values calculated for each NAT-NAT pair across the DepMap CRISPR-CAS KO screen. In bold are shown the significant correlations,  $p < 0.05$  after Bonferonni correction for multiple testing.

**Table S5.** Top correlated genes with NAA40 in 107 liver cancer datasets.

| Rank | Category              | Genes                                                                                                                                                                                                                |
|------|-----------------------|----------------------------------------------------------------------------------------------------------------------------------------------------------------------------------------------------------------------|
| 1    | Cell Cycle            | ABL1; ANAPC4; ANAPC5; ANAPC7; ATM; ATR; BUB1; BUB1B; BUB3; CCNA2; CCNB1; CCNB2; CCNE1; CDC20; CDC25B; CDC45; CDC6; CDC7; CDK4; CHEK1; HDAC1; MCM2; MCM3; MCM4; MCM5; MCM6; MCM7; ORC6; PRKDC; SMC3; TP53; TTK; YWHAB |
| 2    | DNA Replication       | FEN1; LIG1; MCM2; MCM3; MCM4; MCM5; MCM6; MCM7; POLA1; POLA2; POLD1; POLD3; PRIM2; RFC4                                                                                                                              |
| 3    | RNA transport         | AAAS; ACIN1; ALYREF; CASC3; CLNS1A; DDX39B; EIF3B; EIF4G3; ELAC2; KPNB1; NUP133; NUP188; NUP205; NUP210; NUP43; NUP62; NUP85; NUP93; POP1; RNPS1; TACC3; THOC2; THOC5; UBE2I; UPF3B; XPO5                            |
| 4    | Spliceosome           | ACIN1; ALYREF; DDX23; DDX39B; DDX42; EFTUD2; HNRNPA3; HNRNPM; LSM2; PRPF19; PRPF31; PRPF4; PRPF6; RBM25; SART1; SF3B2; SNRNP200; SNRNP40; SNRNP70; SNRPA; SRSF1; THOC2; U2AF2                                        |
| 5    | mRNA surveillance     | ACIN1; ALYREF; CASC3; CPSF1; CPSF6; CPSF7; DAZAP1; DDX39B; MSI2; PABPN1; PPP1CA; PPP2R1A; RNPS1; SMG5; SYMPK; UPF3B; WDR82                                                                                           |
| 6    | Pyrimidine Metabolism | CAD; DTYMK; ENTPD4; ENTPD6; ITPA; NME6; POLA1; POLA2; POLD1; POLD3; POLR1A; POLR2B; POLR2G; POLR3A; PRIM2; RRM1; TYMS                                                                                                |

Genes found within top six enriched KEGG categories for genes correlating with NAA40 across 107 liver cancer datasets (see Fig.5E)
